# Supplementary material for: OpenSeeSimE: A Large-Scale Benchmark to Assess Vision-Language Model Question Answering Capabilities in Engineering Simulations
Source: Research Square preprint supplement (doi:10.21203/rs.3.rs-8389251/v1), 2025-12-25
Supplement: Supplementary file 1 [file 68c3b0d14496147d0aa12268.pdf]

1       OpenSeeSimE: A Large Benchmark to Assess  
2       Vision-Language Model Question Answering  
3       Capabilities in Engineering Simulations

4               Jessica Ezemba<sup>1\*</sup>, Jason Pohl<sup>1</sup>, Conrad Tucker<sup>1</sup>,  
5               Christopher McComb<sup>1</sup>

6       <sup>1\*</sup>Department of Mechanical Engineering, Carnegie Mellon University,  
7       5000 Forbes Avenue, Pittsburgh, 15213, PA, USA.

8       \*Corresponding author(s). E-mail(s): [jezemba@andrew.cmu.edu](mailto:jezemba@andrew.cmu.edu);  
9       Contributing authors: [jpohl@andrew.cmu.edu](mailto:jpohl@andrew.cmu.edu);  
10       [conradt@andrew.cmu.edu](mailto:conradt@andrew.cmu.edu); [ccm@andrew.cmu.edu](mailto:ccm@andrew.cmu.edu);

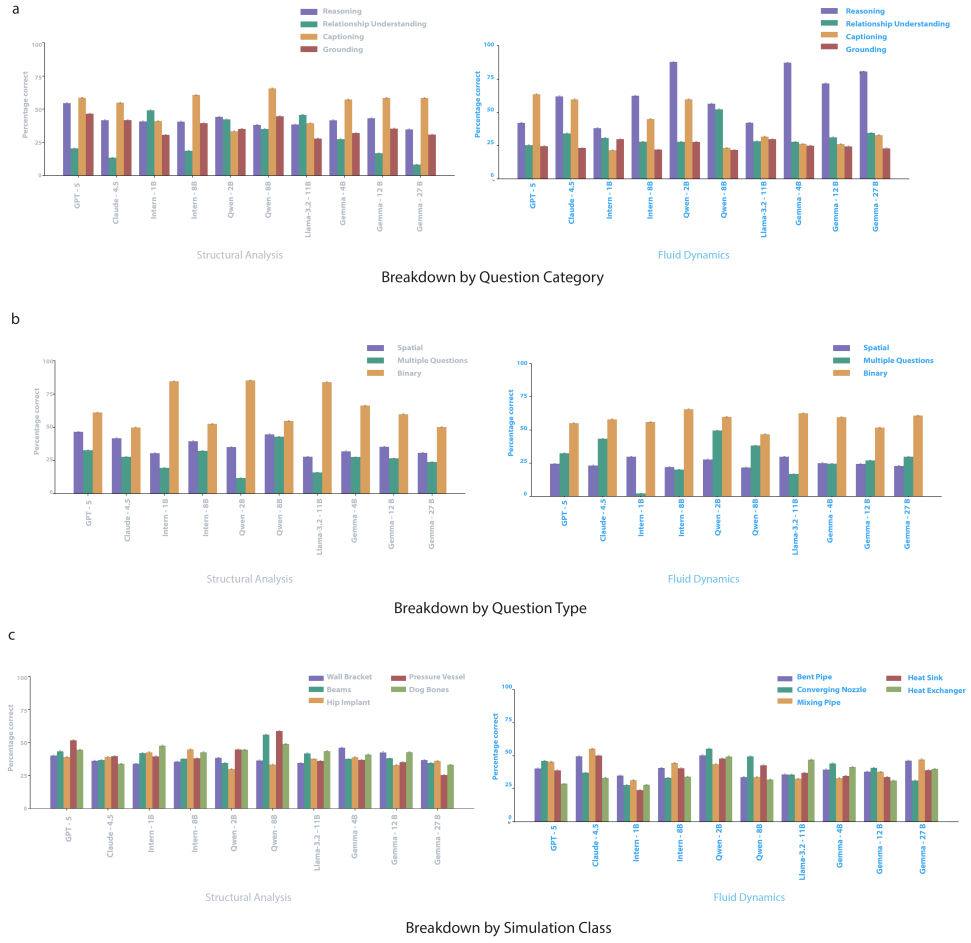

**Supplementary Figure 1** Benchmark accuracy by (a) question category for structural analysis and fluid dynamics analysis showing performance across captioning, reasoning, grounding, and relationship understanding tasks. (b) Benchmark accuracy by question type for structural analysis and fluid dynamics analysis comparing binary classification, multiple-choice reasoning, and spatial grounding performance. (c) Benchmark accuracy by simulation class for structural analysis across Wall Bracket, Beams, Hip Implant, Pressure Vessel, and Dog Bone configurations, and fluid dynamics analysis across Bent Pipe, Converging Nozzle, Mixing Pipe, Heat Sink, and Heat Exchanger configurations.

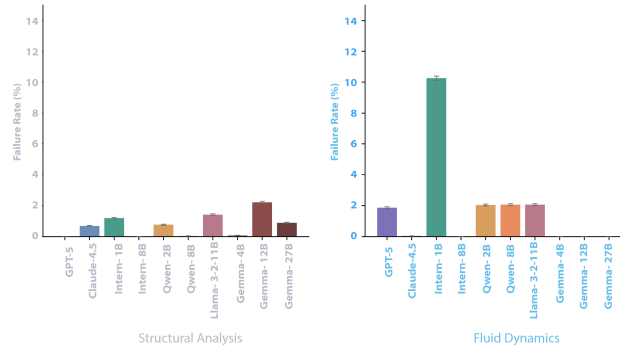

Failure Modes Plot

**Supplementary Figure 2** Failure rates for structural analysis and fluid dynamics analysis showing model reliability in providing valid responses across all question types

**Supplementary Table 1** Flagship model configurations (evaluated on 10% subset for both images and videos). Temperature 0.0 indicates deterministic sampling; higher temperatures follow official model deployment recommendations.

| Model             | Model Identifier                         | Max Tokens | Temperature      |
|-------------------|------------------------------------------|------------|------------------|
| GPT-5             | <code>gpt-5-2025-08-07</code>            | 4096       | — <sup>a</sup>   |
| Qwen3-VL-235B     | <code>Qwen3-VL-235B-A22B-Instruct</code> | 4096       | 0.7 <sup>b</sup> |
| InternVL-3.5-241B | <code>internvl3.5-241b-a28b</code>       | 4096       | 0.0              |
| Gemini-2.5-Flash  | <code>gemini-2.5-flash</code>            | 4096       | 0.0              |

<sup>a</sup> GPT-5 uses reasoning effort: minimal, text verbosity: medium

<sup>b</sup> Qwen3-VL-235B uses top-p: 0.8, rate limit: 2s between requests

**Supplementary Table 2** Video-specific model configurations (evaluated on video subset only, 32 frames uniformly sampled).

| Model           | Model Identifier                               | Frames | Max Tokens | Temp |
|-----------------|------------------------------------------------|--------|------------|------|
| GPT-5           | <code>gpt-5-2025-08-07</code>                  | 32     | 4096       | —    |
| Qwen3-VL-8B     | <code>Qwen/Qwen3-VL-8B-Instruct</code>         | 32     | 4096       | 0.0  |
| InternVL-3.5-8B | <code>OpenGVLab/InternVL3.5-8B-Instruct</code> | 32     | 4096       | 0.0  |
| Gemma-3-12B     | <code>google/gemma-3-12b-it</code>             | 32     | 4096       | 0.0  |

**Supplementary Table 3** Image-only model configurations (evaluated on complete image dataset). All local models use bfloat16 precision with `device_map="auto"` and `do_sample=False` except where noted.

| Model           | Model Identifier                         | Max Tokens | Temp             |
|-----------------|------------------------------------------|------------|------------------|
| Qwen3-VL-2B     | Qwen/Qwen3-VL-2B-Instruct                | 4096       | 0.7 <sup>a</sup> |
| Qwen3-VL-8B     | Qwen/Qwen3-VL-8B-Instruct                | 4096       | 0.0              |
| InternVL-3.5-1B | OpenGVLab/InternVL3.5-1B-Instruct        | 4096       | 0.0              |
| InternVL-3.5-8B | OpenGVLab/InternVL3.5-8B-Instruct        | 4096       | 0.0              |
| Gemma-3-4B      | google/gemma-3-4b-it                     | 4096       | 0.0              |
| Gemma-3-12B     | google/gemma-3-12b-it                    | 4096       | 0.0              |
| Gemma-3-27B     | google/gemma-3-27b-it                    | 4096       | 0.0              |
| LLaMA-3.2-11B   | meta-llama/Llama-3.2-11B-Vision-Instruct | 4096       | 0.0              |

<sup>a</sup> Qwen3-VL-2B uses `do_sample=True` per official guidelines

**Supplementary Table 4** Statistical Significance Analysis for Fluid Dynamics Domain. One-tailed binomial test results (alternative: greater) comparing model performance against chance-level accuracy (50% for binary classification, 25% for multiple-choice reasoning and spatial grounding tasks). The test evaluates whether model accuracy significantly exceeds random guessing. The table reports observed accuracies, uncorrected exact  $p$ -values, Benjamini-Hochberg (BH) corrected  $p$ -values, significance markers, and sample sizes (correct responses/total questions) for all vision-language models across three task categories. Benjamini-Hochberg correction was applied to control the False Discovery Rate across 30 multiple comparisons (10 models  $\times$  3 question types). Significance levels: \*\*\*  $p < 0.001$ ; \*\*  $p < 0.01$ ; \*  $p < 0.05$ ; ns = not significant. All tests employed  $\alpha = 0.05$  with FDR control.

| Model         | Task       | Acc (%) | $p$ -value              | $p$ -value (BH)         | Sig | Correct | Total |
|---------------|------------|---------|-------------------------|-------------------------|-----|---------|-------|
| GPT-5         | Binary     | 55.1    | $2.11 \times 10^{-47}$  | $4.88 \times 10^{-47}$  | *** | 10817   | 19616 |
|               | Multiple Q | 32.5    | $6.30 \times 10^{-123}$ | $2.10 \times 10^{-122}$ | *** | 6364    | 19578 |
|               | Spatial    | 24.5    | 0.868                   | 1.000                   | ns  | 2438    | 9943  |
| Claude-4.5    | Binary     | 58.0    | $8.32 \times 10^{-112}$ | $2.50 \times 10^{-111}$ | *** | 11377   | 19617 |
|               | Multiple Q | 43.3    | $< 10^{-300}$           | $< 10^{-300}$           | *** | 8486    | 19581 |
|               | Spatial    | 23.2    | 1.000                   | 1.000                   | ns  | 2308    | 9943  |
| Intern-1B     | Binary     | 56.0    | $1.80 \times 10^{-64}$  | $4.91 \times 10^{-64}$  | *** | 10992   | 19617 |
|               | Multiple Q | 2.2     | 1.000                   | 1.000                   | ns  | 429     | 19581 |
|               | Spatial    | 29.8    | $4.68 \times 10^{-28}$  | $9.35 \times 10^{-28}$  | *** | 2967    | 9943  |
| Intern-8B     | Binary     | 65.5    | $< 10^{-300}$           | $< 10^{-300}$           | *** | 12858   | 19617 |
|               | Multiple Q | 20.2    | 1.000                   | 1.000                   | ns  | 3957    | 19581 |
|               | Spatial    | 22.0    | 1.000                   | 1.000                   | ns  | 2192    | 9943  |
| Qwen-2B       | Binary     | 59.9    | $8.59 \times 10^{-170}$ | $3.68 \times 10^{-169}$ | *** | 11746   | 19617 |
|               | Multiple Q | 49.7    | $< 10^{-300}$           | $< 10^{-300}$           | *** | 9725    | 19581 |
|               | Spatial    | 27.7    | $3.74 \times 10^{-10}$  | $6.61 \times 10^{-10}$  | *** | 2755    | 9943  |
| Qwen-8B       | Binary     | 46.7    | 1.000                   | 1.000                   | ns  | 9161    | 19617 |
|               | Multiple Q | 38.3    | $< 10^{-300}$           | $< 10^{-300}$           | *** | 7497    | 19581 |
|               | Spatial    | 21.7    | 1.000                   | 1.000                   | ns  | 2160    | 9943  |
| Llama-3.2-11B | Binary     | 62.5    | $1.67 \times 10^{-273}$ | $1.00 \times 10^{-272}$ | *** | 12269   | 19617 |
|               | Multiple Q | 16.9    | 1.000                   | 1.000                   | ns  | 3305    | 19581 |
|               | Spatial    | 29.8    | $4.68 \times 10^{-28}$  | $9.35 \times 10^{-28}$  | *** | 2967    | 9943  |
| Gemma-4B      | Binary     | 59.6    | $2.33 \times 10^{-160}$ | $8.73 \times 10^{-160}$ | *** | 11691   | 19617 |
|               | Multiple Q | 24.6    | 0.924                   | 1.000                   | ns  | 4809    | 19581 |
|               | Spatial    | 24.9    | 0.557                   | 0.879                   | ns  | 2480    | 9943  |
| Gemma-12B     | Binary     | 51.8    | $1.99 \times 10^{-7}$   | $3.32 \times 10^{-7}$   | *** | 10164   | 19617 |
|               | Multiple Q | 27.0    | $6.83 \times 10^{-11}$  | $1.28 \times 10^{-10}$  | *** | 5288    | 19581 |
|               | Spatial    | 24.4    | 0.926                   | 1.000                   | ns  | 2424    | 9943  |
| Gemma-27B     | Binary     | 60.8    | $2.47 \times 10^{-204}$ | $1.24 \times 10^{-203}$ | *** | 11935   | 19617 |
|               | Multiple Q | 29.9    | $4.69 \times 10^{-55}$  | $1.17 \times 10^{-54}$  | *** | 5859    | 19581 |
|               | Spatial    | 22.9    | 1.000                   | 1.000                   | ns  | 2281    | 9943  |

**Supplementary Table 5** Statistical Significance Analysis for Structural Analysis Domain. One-tailed binomial test results (alternative: greater) comparing model performance against chance-level accuracy (50% for binary classification, 25% for multiple-choice reasoning and spatial grounding tasks). The test evaluates whether model accuracy significantly exceeds random guessing. The table reports observed accuracies, uncorrected exact  $p$ -values, Benjamini-Hochberg (BH) corrected  $p$ -values, significance markers, and sample sizes (correct responses/total questions) for all vision-language models across three task categories. Benjamini-Hochberg correction was applied to control the False Discovery Rate across 30 multiple comparisons (10 models  $\times$  3 question types). Significance levels: \*\*\*  $p < 0.001$ ; \*\*  $p < 0.01$ ; \*  $p < 0.05$ ; ns = not significant. All tests employed  $\alpha = 0.05$  with FDR control.

| Model         | Task       | Acc (%) | $p$ -value              | $p$ -value (BH)         | Sig | Correct | Total |
|---------------|------------|---------|-------------------------|-------------------------|-----|---------|-------|
| GPT-5         | Binary     | 61.1    | $1.35 \times 10^{-168}$ | $3.68 \times 10^{-168}$ | *** | 9458    | 15488 |
|               | Multiple Q | 32.7    | $2.05 \times 10^{-170}$ | $6.16 \times 10^{-170}$ | *** | 8446    | 25811 |
|               | Spatial    | 46.5    | $< 10^{-300}$           | $< 10^{-300}$           | *** | 4756    | 10232 |
| Claude-4.5    | Binary     | 49.9    | 0.583                   | 0.672                   | ns  | 7732    | 15489 |
|               | Multiple Q | 27.7    | $2.32 \times 10^{-23}$  | $3.49 \times 10^{-23}$  | *** | 7149    | 25811 |
|               | Spatial    | 41.7    | $1.37 \times 10^{-297}$ | $5.12 \times 10^{-297}$ | *** | 4268    | 10240 |
| Intern-1B     | Binary     | 84.7    | $< 10^{-300}$           | $< 10^{-300}$           | *** | 13116   | 15489 |
|               | Multiple Q | 19.5    | 1.000                   | 1.000                   | ns  | 5024    | 25811 |
|               | Spatial    | 30.5    | $7.79 \times 10^{-37}$  | $1.30 \times 10^{-36}$  | *** | 3126    | 10240 |
| Intern-8B     | Binary     | 52.6    | $3.76 \times 10^{-11}$  | $5.13 \times 10^{-11}$  | *** | 8150    | 15489 |
|               | Multiple Q | 32.3    | $1.19 \times 10^{-152}$ | $2.98 \times 10^{-152}$ | *** | 8335    | 25811 |
|               | Spatial    | 39.4    | $2.00 \times 10^{-225}$ | $6.67 \times 10^{-225}$ | *** | 4036    | 10240 |
| Qwen-2B       | Binary     | 85.3    | $< 10^{-300}$           | $< 10^{-300}$           | *** | 13215   | 15489 |
|               | Multiple Q | 11.8    | 1.000                   | 1.000                   | ns  | 3051    | 25811 |
|               | Spatial    | 35.1    | $3.93 \times 10^{-114}$ | $7.86 \times 10^{-114}$ | *** | 3592    | 10240 |
| Qwen-8B       | Binary     | 54.8    | $8.61 \times 10^{-33}$  | $1.36 \times 10^{-32}$  | *** | 8483    | 15489 |
|               | Multiple Q | 42.8    | $< 10^{-300}$           | $< 10^{-300}$           | *** | 11056   | 25811 |
|               | Spatial    | 44.6    | $< 10^{-300}$           | $< 10^{-300}$           | *** | 4568    | 10240 |
| Llama-3.2-11B | Binary     | 83.9    | $< 10^{-300}$           | $< 10^{-300}$           | *** | 12997   | 15489 |
|               | Multiple Q | 16.0    | 1.000                   | 1.000                   | ns  | 4134    | 25811 |
|               | Spatial    | 27.8    | $6.86 \times 10^{-11}$  | $8.95 \times 10^{-11}$  | *** | 2845    | 10240 |
| Gemma-4B      | Binary     | 66.4    | $< 10^{-300}$           | $< 10^{-300}$           | *** | 10284   | 15489 |
|               | Multiple Q | 27.6    | $3.71 \times 10^{-22}$  | $5.30 \times 10^{-22}$  | *** | 7129    | 25811 |
|               | Spatial    | 31.9    | $1.17 \times 10^{-55}$  | $2.19 \times 10^{-55}$  | *** | 3266    | 10240 |
| Gemma-12B     | Binary     | 59.8    | $6.94 \times 10^{-132}$ | $1.60 \times 10^{-131}$ | *** | 9259    | 15489 |
|               | Multiple Q | 26.6    | $2.90 \times 10^{-9}$   | $3.62 \times 10^{-9}$   | *** | 6861    | 25811 |
|               | Spatial    | 35.3    | $1.17 \times 10^{-119}$ | $2.51 \times 10^{-119}$ | *** | 3618    | 10240 |
| Gemma-27B     | Binary     | 50.2    | 0.321                   | 0.385                   | ns  | 7774    | 15489 |
|               | Multiple Q | 23.8    | 1.000                   | 1.000                   | ns  | 6150    | 25811 |
|               | Spatial    | 30.8    | $1.16 \times 10^{-39}$  | $2.05 \times 10^{-39}$  | *** | 3149    | 10240 |

**Supplementary Table 6** Practical Significance Analysis for Fluid Dynamics Domain. Cohen’s  $h$  effect sizes measuring the magnitude of performance differences from chance-level baselines (50% for binary classification, 25% for multiple-choice reasoning and spatial grounding tasks). Effect size categories follow Cohen’s conventional benchmarks: Negligible ( $|h| < 0.20$ ), Small ( $0.20 \leq |h| < 0.50$ ), Medium ( $0.50 \leq |h| < 0.80$ ), Large ( $|h| \geq 0.80$ ). The table reports observed accuracies, percentage point differences from chance (Diff), Cohen’s  $h$  values, effect size categories, and 95% confidence intervals for all vision-language models across three task categories.

| Model         | Task       | Acc   | Diff    | Cohen’s $h$ | Effect     | 95% CI       |
|---------------|------------|-------|---------|-------------|------------|--------------|
| GPT-5         | Binary     | 55.1% | +5.1pp  | 0.103       | Negligible | 54.4%, 55.8% |
|               | Multiple Q | 32.5% | +7.5pp  | 0.166       | Negligible | 31.9%, 33.2% |
|               | Spatial    | 24.5% | −0.5pp  | −0.011      | Negligible | 23.7%, 25.4% |
| Claude-4.5    | Binary     | 58.0% | +8.0pp  | 0.161       | Negligible | 57.3%, 58.7% |
|               | Multiple Q | 43.3% | +18.3pp | 0.390       | Small      | 42.6%, 44.0% |
|               | Spatial    | 23.2% | −1.8pp  | −0.042      | Negligible | 22.4%, 24.1% |
| Intern-1B     | Binary     | 56.0% | +6.0pp  | 0.121       | Negligible | 55.3%, 56.7% |
|               | Multiple Q | 2.2%  | −22.8pp | −0.750      | Medium     | [2.0%, 2.4%] |
|               | Spatial    | 29.8% | +4.8pp  | 0.109       | Negligible | 28.9%, 30.7% |
| Intern-8B     | Binary     | 65.5% | +15.5pp | 0.316       | Small      | 64.9%, 66.2% |
|               | Multiple Q | 20.2% | −4.8pp  | −0.115      | Negligible | 19.7%, 20.8% |
|               | Spatial    | 22.0% | −3.0pp  | −0.070      | Negligible | 21.2%, 22.9% |
| Qwen-2B       | Binary     | 59.9% | +9.9pp  | 0.199       | Negligible | 59.2%, 60.6% |
|               | Multiple Q | 49.7% | +24.7pp | 0.517       | Medium     | 49.0%, 50.4% |
|               | Spatial    | 27.7% | +2.7pp  | 0.061       | Negligible | 26.8%, 28.6% |
| Qwen-8B       | Binary     | 46.7% | −3.3pp  | −0.066      | Negligible | 46.0%, 47.4% |
|               | Multiple Q | 38.3% | +13.3pp | 0.287       | Small      | 37.6%, 39.0% |
|               | Spatial    | 21.7% | −3.3pp  | −0.077      | Negligible | 20.9%, 22.5% |
| Llama-3.2-11B | Binary     | 62.5% | +12.5pp | 0.254       | Small      | 61.9%, 63.2% |
|               | Multiple Q | 16.9% | −8.1pp  | −0.200      | Small      | 16.4%, 17.4% |
|               | Spatial    | 29.8% | +4.8pp  | 0.109       | Negligible | 28.9%, 30.7% |
| Gemma-4B      | Binary     | 59.6% | +9.6pp  | 0.193       | Negligible | 58.9%, 60.3% |
|               | Multiple Q | 24.6% | −0.4pp  | −0.010      | Negligible | 24.0%, 25.2% |
|               | Spatial    | 24.9% | −0.1pp  | −0.001      | Negligible | 24.1%, 25.8% |
| Gemma-12B     | Binary     | 51.8% | +1.8pp  | 0.036       | Negligible | 51.1%, 52.5% |
|               | Multiple Q | 27.0% | +2.0pp  | 0.046       | Negligible | 26.4%, 27.6% |
|               | Spatial    | 24.4% | −0.6pp  | −0.014      | Negligible | 23.5%, 25.2% |
| Gemma-27B     | Binary     | 60.8% | +10.8pp | 0.219       | Small      | 60.2%, 61.5% |
|               | Multiple Q | 29.9% | +4.9pp  | 0.110       | Negligible | 29.3%, 30.6% |
|               | Spatial    | 22.9% | −2.1pp  | −0.048      | Negligible | 22.1%, 23.8% |

**Supplementary Table 7** Practical Significance Analysis for Structural Analysis

Domain. Cohen’s  $h$  effect sizes measuring the magnitude of performance differences from chance-level baselines (50% for binary classification, 25% for multiple-choice reasoning and spatial grounding tasks). Effect size categories follow Cohen’s conventional benchmarks: Negligible ( $|h| < 0.20$ ), Small ( $0.20 \leq |h| < 0.50$ ), Medium ( $0.50 \leq |h| < 0.80$ ), Large ( $|h| \geq 0.80$ ). The table reports observed accuracies, percentage point differences from chance (Diff), Cohen’s  $h$  values, effect size categories, and 95% confidence intervals for all vision-language models across three task categories.

| Model         | Task       | Acc   | Diff    | Cohen’s $h$ | Effect     | 95% CI       |
|---------------|------------|-------|---------|-------------|------------|--------------|
| GPT-5         | Binary     | 61.1% | +11.1pp | 0.223       | Small      | 60.3%, 61.8% |
|               | Multiple Q | 32.7% | +7.7pp  | 0.171       | Negligible | 32.2%, 33.3% |
|               | Spatial    | 46.5% | +21.5pp | 0.453       | Small      | 45.5%, 47.4% |
| Claude-4.5    | Binary     | 49.9% | −0.1pp  | −0.002      | Negligible | 49.1%, 50.7% |
|               | Multiple Q | 27.7% | +2.7pp  | 0.061       | Negligible | 27.2%, 28.2% |
|               | Spatial    | 41.7% | +16.7pp | 0.356       | Small      | 40.7%, 42.6% |
| Intern-1B     | Binary     | 84.7% | +34.7pp | 0.766       | Medium     | 84.1%, 85.2% |
|               | Multiple Q | 19.5% | −5.5pp  | −0.133      | Negligible | 19.0%, 20.0% |
|               | Spatial    | 30.5% | +5.5pp  | 0.124       | Negligible | 29.6%, 31.4% |
| Intern-8B     | Binary     | 52.6% | +2.6pp  | 0.052       | Negligible | 51.8%, 53.4% |
|               | Multiple Q | 32.3% | +7.3pp  | 0.162       | Negligible | 31.7%, 32.9% |
|               | Spatial    | 39.4% | +14.4pp | 0.310       | Small      | 38.5%, 40.4% |
| Qwen-2B       | Binary     | 85.3% | +35.3pp | 0.784       | Medium     | 84.8%, 85.9% |
|               | Multiple Q | 11.8% | −13.2pp | −0.345      | Small      | 11.4%, 12.2% |
|               | Spatial    | 35.1% | +10.1pp | 0.221       | Small      | 34.2%, 36.0% |
| Qwen-8B       | Binary     | 54.8% | +4.8pp  | 0.096       | Negligible | 54.0%, 55.6% |
|               | Multiple Q | 42.8% | +17.8pp | 0.380       | Small      | 42.2%, 43.4% |
|               | Spatial    | 44.6% | +19.6pp | 0.416       | Small      | 43.6%, 45.6% |
| Llama-3.2-11B | Binary     | 83.9% | +33.9pp | 0.745       | Medium     | 83.3%, 84.5% |
|               | Multiple Q | 16.0% | −9.0pp  | −0.224      | Small      | 15.6%, 16.5% |
|               | Spatial    | 27.8% | +2.8pp  | 0.063       | Negligible | 26.9%, 28.7% |
| Gemma-4B      | Binary     | 66.4% | +16.4pp | 0.334       | Small      | 65.6%, 67.1% |
|               | Multiple Q | 27.6% | +2.6pp  | 0.060       | Negligible | 27.1%, 28.2% |
|               | Spatial    | 31.9% | +6.9pp  | 0.153       | Negligible | 31.0%, 32.8% |
| Gemma-12B     | Binary     | 59.8% | +9.8pp  | 0.197       | Negligible | 59.0%, 60.5% |
|               | Multiple Q | 26.6% | +1.6pp  | 0.036       | Negligible | 26.0%, 27.1% |
|               | Spatial    | 35.3% | +10.3pp | 0.226       | Small      | 34.4%, 36.3% |
| Gemma-27B     | Binary     | 50.2% | +0.2pp  | 0.004       | Negligible | 49.4%, 51.0% |
|               | Multiple Q | 23.8% | −1.2pp  | −0.027      | Negligible | 23.3%, 24.4% |
|               | Spatial    | 30.8% | +5.8pp  | 0.128       | Negligible | 29.9%, 31.7% |



# 1 Supplementary Note 1: Automated Ground Truth Extraction Protocols

## 1.1 Selecting Simulation Examples

Engineering simulation benchmarks traditionally rely on limited, manually curated datasets that may not capture the full diversity of real-world engineering applications. To address this limitation, we developed a systematic approach for generating a comprehensive dataset of approximately 10,000 simulation examples through parametric variation of established simulation models. With 10 questions per simulation instance per domain (20 total per instance), this generates over 200,000 total question-answer pairs across both domains.

Our simulation examples were sourced from publicly available **Ansys** Tutorial files, which provide validated baseline configurations with proper boundary conditions and convergence settings. From the extensive tutorial library, we selected base models using a structured selection framework based on three primary criteria designed to maximize dataset diversity and benchmark coverage.

1. Parametric Variability: Base models were selected based on their capacity for meaningful geometric and boundary condition variations. Each selected simulation contained multiple adjustable parameters that could generate distinct simulation outcomes while maintaining physical validity. This approach captured the range of configurations rather than relying on static, single-configuration examples.
2. Simulation Type Coverage: Models were chosen to represent the full spectrum of simulation categories required by our visual question-answering benchmark. This systematic selection ensured comprehensive coverage of essential engineering phenomena including turbulence modeling and structural failure modes across diverse geometric configurations and loading conditions.
3. Representative Engineering Applications: Selected simulations span diverse engineering domains to ensure our benchmark reflects real-world analysis scenarios that practicing engineers encounter across different industries and applications.

For each base simulation, we implemented parametric design automation using Ansys Python interfaces (**PyMechanical**, **PyFluent**, and **PyGeometry**) and list generation software (**MATLAB**) to systematically vary five critical parameters encompassing geometric dimensions, boundary conditions, and material properties. Parameter ranges were established by expert designers to ensure all generated variations remained within physically meaningful bounds while maximizing solution diversity. Each parameter had 4 values chosen, linearly spaced between 2 "extreme" cases, generating small, small-medium, large-medium, and large values that created substantial variations in each output instance. These 4 values across 5 parameters generated 1,024 unique simulation instances per base model, with parameter settings generated using systematic looping to create each unique set of conditions.

In the mechanical models, the geometry parameters led to different stress concentrations and loading conditions. The boundary condition parameters (changes in axial or bending load forces) and material property parameters (changes in physical characteristics) produced distinct stress, strain, and displacement effects. In the fluid

models, the geometry parameters created unique turbulence regions and flow regimes. The boundary condition parameters (fluid velocity) and material property parameters (viscosity) affected the velocity, pressure, and turbulence results.

### 1.1.1 Structural Analysis Models:

The *Dog Bone* specimen represents standard tensile testing configurations with stress concentrations at the reduced cross-section, requiring interpretation of von Mises stress distributions and failure prediction across varying geometries and loading conditions. The *Hip Implant* model simulates complex biomedical loading with combined axial and bending stresses, presenting challenging stress visualization patterns around irregular geometries. The *Pressure Vessel* involves internal pressure loading creating circumferential and axial stress fields with material-dependent responses. The *Beams* utilize mechanical loading, requiring analysis of stress patterns and material property variations for different beam profiles. The *Wall Bracket* features complex three-dimensional stress distributions under bending loads with stress concentrations at geometric transitions.

### 1.1.2 Fluid Dynamics Models:

The *Bent Pipe* generates complex flow patterns and pressure losses with varying turbulence intensities dependent on bend geometry and flow conditions. The *Converging Nozzle* creates acceleration zones with pressure gradients and potential flow separation requiring analysis of velocity vector fields and pressure contours. The *Mixing Pipe* involves multi-stream interactions with complex velocity and pressure patterns at the junction. The *Heat Sink* and *Heat Exchanger* models generate intricate flow patterns around fin geometries with heat transfer effects, creating complex visualization challenges involving velocity vectors and pressure fields that vary with geometric and boundary condition parameters.

## 1.2 Automated Ground Truth Extraction Infrastructure

The automated ground truth extraction system operates through direct programmatic interfaces to simulation software, bypassing visual interpretation entirely. For fluid dynamics simulations, we employ PyFluent’s solver session interface to export field data through Ansys Fluent’s Text User Interface (TUI) commands. All fluid simulations utilize three-dimensional representations with Cartesian coordinate systems, extracting velocity components (x-velocity, y-velocity, z-velocity), pressure fields, temperature distributions, and Mach numbers where applicable. Data exports generate ASCII-formatted files containing nodal coordinates and corresponding field values, with file sizes typically ranging from hundreds of kilobytes to several megabytes depending on mesh density.

For structural analysis, PyMechanical provides access to finite element results through Ansys Mechanical’s scripting interface. The system extracts von Mises stress tensors, displacement vectors, strain components, and temperature fields at nodal locations. Each extraction preserves spatial coordinate information (X, Y, Z positions) alongside field values, enabling subsequent geometric analysis for symmetry detection

95 and spatial localization tasks. Session management follows a single-instance paradigm  
96 where each simulation case file loads once and serves all question extraction proce-  
97 dures sequentially. This approach minimizes computational overhead from repeated file  
98 loading operations while maintaining consistency in visualization parameters across  
99 questions sharing common data requirements. Fluent sessions initialize with double  
100 precision arithmetic and utilize multiple processor cores for parallel data extraction  
101 operations.

### 102 1.3 Statistical Analysis Procedures

103 Questions requiring identification of extreme values or aggregate statistics operate  
104 directly on extracted field arrays using standard numerical operations. The system  
105 loads relevant data files into pandas DataFrame structures, validates data quality  
106 through finite value checks (excluding NaN and infinite values), and applies appro-  
107 priate statistical functions. For maximum and minimum value queries, the system  
108 employs NumPy's optimized array operations to identify extrema with computational  
109 complexity linear in the number of data points. Relative magnitude assessments, such  
110 as determining whether values span one, two, or three orders of magnitude, compute  
111 the ratio between maximum and minimum field values. The system applies the follow-  
112 ing classification scheme: ratios below 10 indicate less than one order of magnitude,  
113 ratios between 10 and 100 represent one to two orders, ratios between 100 and 1000  
114 span two to three orders, and ratios exceeding 1000 encompass more than three orders  
115 of magnitude. For fields containing negative values, the system employs alternative  
116 ratio calculations based on absolute value ranges to ensure meaningful magnitude  
117 comparisons.

### 118 1.4 Distribution Analysis Implementation

#### 119 1.4.1 Structural Uniformity Assessment

120 Stress distribution uniformity analysis employs coefficient of variation (CV) as the  
121 primary metric, defined as the ratio of standard deviation to mean value. The system  
122 extracts von Mises stress values across all nodes, computes statistical measures on the  
123 resulting distribution, and applies a uniformity threshold of  $CV \leq 0.2$  (20% coefficient  
124 of variation). The system requires a minimum of three data points for meaningful  
125 statistical analysis, rejecting datasets below this threshold. Distribution uniformity  
126 extends beyond simple variance measures to incorporate spatial considerations. The  
127 system validates that extracted stress values span the entire geometric domain rather  
128 than representing localized clusters, ensuring that uniformity assessments reflect global  
129 distribution characteristics rather than sampling artifacts.

#### 130 1.4.2 Fluid Stagnation Zone Detection

131 Dead zone identification in fluid dynamics requires determining regions where flow  
132 velocity falls below thresholds indicating effective stagnation. The system applies a  
133 velocity magnitude threshold of  $1 \times 10^{-6}$  (one micron per second), representing a  
134 value several orders of magnitude below typical flow velocities that effectively indicates

numerical zero in the context of engineering simulations. For each node in the extracted velocity field, the system classifies velocities below this threshold as stagnant, computing the fraction of total nodes meeting this criterion. Binary classification as yes/no for dead zone presence depends on whether any significant fraction of the domain exhibits stagnant flow characteristics. The system employs a conservative approach where even small percentages of stagnant nodes (above negligible numerical noise levels) trigger affirmative classification, acknowledging that engineering significance of dead zones relates more to their presence than their spatial extent.

## 1.5 Symmetry Analysis Protocols

Symmetry detection requires assessing whether field distributions exhibit mirror invariance about specified coordinate planes. The system implements a comprehensive symmetry analysis procedure applicable to both structural deformation patterns and fluid flow fields. For each candidate symmetry plane (X-plane, Y-plane, or Z-plane), the system first determines the plane's spatial location by computing the midpoint of the geometric domain along the relevant axis. It then generates mirrored coordinate sets by reflecting each node's position across this plane. Using scipy's cdist function, the system computes Euclidean distances between original and mirrored coordinate sets, identifying symmetric node pairs where spatial separation falls below a coordinate matching tolerance of  $1 \times 10^{-3}$  (one millimeter). For each identified symmetric pair, the system compares field values through relative difference calculations:  $|val_1 - val_2| / \max(|val_1|, |val_2|, 10^{-10})$ , where the denominator's small constant prevents division by zero for near-zero values. The system applies a base symmetry tolerance of 5% for value comparisons, though certain structural analysis questions employ a relaxed 10% tolerance to accommodate numerical solution variability in finite element results. Classification as symmetric requires that at least 90% of identified node pairs exhibit value differences within the specified tolerance for fluid dynamics questions, while structural analysis employs a 60% threshold reflecting the greater solution variability inherent in solid mechanics computations. The system evaluates symmetry about all three coordinate planes independently, classifying overall symmetry based on whether any single plane meets the criteria (questions asking "Is the pattern symmetric?") or identifying which specific plane demonstrates the strongest symmetry (questions asking "What is the axis of symmetry?").

## 1.6 Physics-Based Classification Methods

### 1.6.1 Flow Regime Characterization

Mach number analysis categorizes flow speed relative to the local speed of sound, employing standard aerospace engineering classification criteria. The system first attempts to extract Mach number fields directly from simulation results when available. For simulations lacking explicit Mach data, the system computes Mach numbers from velocity magnitude fields by dividing by the appropriate speed of sound: 343.0 m/s for air at standard conditions (20°C, 1 atmosphere) or 1482.0 m/s for water at 20°C. Flow regime classification operates on maximum Mach numbers rather than domain-averaged values, recognizing that localized supersonic regions may exist within

177 predominantly subsonic flows. The system applies the following thresholds: maximum  
178 Mach below 0.8 classifies as subsonic, maximum Mach between 0.8 and 1.2 indicates  
179 transonic flow, and maximum Mach exceeding 1.2 designates supersonic conditions.

### 180 **1.6.2 Flow Direction Analysis**

181 Dominant flow direction determination analyzes mean absolute velocity magnitudes  
182 across spatial dimensions. For three-dimensional simulations, the system extracts  
183 velocity component fields (x-velocity, y-velocity, z-velocity), computes the mean of  
184 absolute values for each component independently, and identifies which component  
185 exhibits the largest mean magnitude. This approach correctly handles flows with signif-  
186 icant reverse components, where signed mean values would artificially reduce apparent  
187 flow strength. Classification as "complex multidirectional" rather than dominant along  
188 a single axis employs a tolerance-based criterion. The system computes the mean of all  
189 component means and checks whether each individual component mean falls within  
190 5% of this global mean. When all components satisfy this proximity criterion, the  
191 flow exhibits insufficient directional bias for classification as dominant along any sin-  
192 gle axis. Otherwise, the component with maximum mean absolute velocity determines  
193 the dominant direction.

### 194 **1.6.3 Stress Type Classification**

195 Structural analysis questions requiring classification of dominant stress types (bend-  
196 ing, shear, axial, or torsion) extract relevant stress tensor components and compare  
197 their magnitudes according to solid mechanics principles. The system analyzes stress  
198 distributions in critical regions, typically identified as zones exhibiting maximum von  
199 Mises stress or maximum deformation magnitude. Classification criteria derive from  
200 examining ratios between normal stress components, shear stress components, and  
201 their spatial gradients, though specific implementation details vary by geometry and  
202 loading conditions.

### 203 **1.6.4 Deformation Direction Analysis**

204 Significant deformation direction identification follows analogous procedures to  
205 flow direction analysis, extracting displacement components (X-displacement, Y-  
206 displacement, Z-displacement) and computing mean absolute magnitudes. The system  
207 identifies whether deformation primarily occurs along a single coordinate axis or  
208 exhibits complex multi-directional character through the same tolerance-based com-  
209 parison used for fluid flow analysis. An additional classification distinguishes between  
210 in-plane and out-of-plane deformation patterns for planar structural geometries, com-  
211 puted through relative magnitude comparisons between displacement components  
212 parallel and perpendicular to the structure's primary plane (that is user defined).

### 213 **1.6.5 Tensile Stress Predominance**

214 Determining whether stresses are predominantly tensile examines the signs of  
215 extracted normal stress values. The system counts nodes exhibiting positive (tensile)

216 versus negative (compressive) stress values, classifying the pattern as predominantly  
217 tensile when positive values outnumber negative values. This simple criterion suffices  
218 for binary classification while avoiding arbitrary threshold definitions for mixed stress  
219 states.

## 220 1.7 Spatial Localization and Region Labeling

221 Region-based grounding questions require generating visualizations with labeled loca-  
222 tions and determining which region contains specified target features. This process  
223 involves three distinct phases: target identification from numerical data, region gen-  
224 eration on rendered visualizations, and ground truth determination through spatial  
225 proximity calculations.

### 226 1.7.1 Visualization Generation

227 The system generates standardized visualizations through direct control of simula-  
228 tion software rendering parameters. For fluid dynamics, PyFluent’s graphics object  
229 interface sets contour and vector plot properties, camera positions, and color mapping  
230 schemes. Structural analysis employs PyMechanical’s result visualization controls to  
231 configure stress or displacement contour plots with consistent color schemes. All visu-  
232 alizations render at  $1920 \times 1440$  pixel resolution to ensure sufficient detail for spatial  
233 localization tasks while maintaining consistent aspect ratios across instances. View ori-  
234 entations follow standardized definitions: front, back, left, right, top, and bottom views  
235 align camera positions with principal axes, while isometric views employ 45-degree  
236 elevation and azimuth angles. The system saves rendered images as PNG files with  
237 lossless compression, preserving color fidelity essential for subsequent region labeling  
238 operations.

### 239 1.7.2 Legend and Text Detection

240 Before placing region labels, the system must identify areas to avoid to prevent obscur-  
241 ing critical information or overlapping with existing annotations. We employ **EasyOCR**  
242 with English language models to detect text regions within generated visualizations,  
243 applying a confidence threshold of 0.3 to filter spurious detections. Detected text  
244 regions receive padding of 30 pixels on all sides to ensure labels maintain readable separa-  
245 tion. Legend detection specifically identifies color bars and their associated numerical  
246 labels through pattern matching on scientific notation text. The system searches for  
247 text strings matching the regular expression pattern `-?\d+\.\d*[e][+-]?\d+`, repre-  
248 senting floating-point numbers in exponential format commonly used for engineering  
249 field values. When multiple scientific notation strings appear vertically or horizontally  
250 aligned within 30 pixels, the system groups them as belonging to the same legend bar.  
251 Valid legend groups require at least two numerical labels to avoid false positives from  
252 isolated exponential notation. Once identified, the system estimates the spatial extent  
253 of each legend by computing bounding boxes around detected text groups, extending  
254 100 pixels to the left (the typical colorbar width) and 40 pixels above and below the  
255 text cluster. An additional safety margin applies a  $20 \times 20$  pixel dilation kernel to cre-  
256 ate buffer zones around all detected legend areas, ensuring robust separation between

labels and legends even when initial detection boundaries prove imprecise. Additional avoidance regions include image borders (30 pixels from edges), very light areas (RGB values exceeding 240 on 0-255 scale, indicating white background), and very dark areas (RGB values below 20, indicating black background or unlabeled regions). For structural visualizations, the system also detects and avoids axis indicators—small colored arrows or text typically rendered in pure red, green, or blue that denote coordinate system orientation. These indicators occupy areas between 50 and 2000 pixels, with 40-pixel padding applied around each detected indicator.

### 1.7.3 Color Gradient Analysis

Engineering visualization standards employ rainbow color gradients mapping from red (maximum values) through yellow and green to blue (minimum values). The system generates a reference gradient containing 20 discrete color steps spanning this spectrum through RGB interpolation. For fluid dynamics, the gradient represents flow field magnitudes; for structural analysis, it represents stress or displacement magnitudes. To classify any pixel in the visualization as belonging to the simulation color scheme versus background or annotation elements, the system computes Euclidean distances in RGB space between the pixel's color and all reference gradient colors. Colors falling within a tolerance of 80 Euclidean distance units (on a 0-255 RGB scale) from any reference gradient color classify as simulation colors; colors exceeding this threshold classify as background or annotation elements. This tolerance accommodates rendering antialiasing and color interpolation artifacts while maintaining sufficient specificity to distinguish simulation data from interface elements.

### 1.7.4 Region Point Selection

The system selects four points (A, B, C, D) for region labeling through a constrained random sampling procedure that ensures spatial distribution, simulation color association, and sufficient mutual separation. Starting from the set of all pixels classified as simulation colors and not falling within legend, text, or border avoidance masks, the system randomly shuffles candidate positions and iteratively selects points meeting the following criteria:

- The pixel color must fall within the simulation color tolerance (80-unit Euclidean distance from the gradient)
- Spatial separation from all previously selected points must exceed 50 pixels initially
- If fewer than four points satisfy the initial constraint after exhaustive search, the system relaxes the spatial separation requirement to 20 pixels and repeats selection

This approach balances the competing objectives of spatial distribution (ensuring labels span the visualization domain rather than clustering) and color diversity (ensuring labels correspond to meaningful field value ranges rather than uniform regions). The relaxed spatial constraint accommodates visualizations where simulation colors occupy relatively small portions of the image domain due to large legends or extensive background areas. For each selected point, the system determines its color gradient level by identifying which of the 20 reference gradient colors exhibits minimum Euclidean distance in RGB space. Higher gradient indices correspond to colors closer

299 to red (representing higher field values), while lower indices correspond to colors  
300 closer to blue (representing lower field values). This mapping enables subsequent label  
301 assignment based on relative color intensities.

### 302 1.7.5 Label Assignment and Ground Truth Determination

303 For questions asking about maximum value locations, the system assigns labels such  
304 that at least one of the four selected points exhibits a local maximum color gradi-  
305 ent level among the four points. The point with the highest gradient level receives  
306 the ground truth label, while remaining points receive alternative labels in descending  
307 order of their gradient levels. This scheme ensures that selecting the "reddest" region  
308 among the four labeled options yields correct answers, but critically, it does not guar-  
309 antee that any labeled region corresponds to the global maximum across the entire  
310 visualization domain. Conversely, for questions asking about minimum value locations,  
311 label assignment proceeds in reverse order, with the point exhibiting the lowest gra-  
312 dient level receiving the ground truth label. This bidirectional assignment strategy  
313 prevents models from learning simple heuristics such as "always choose the reddest  
314 region" or "always choose the bluest region" across different question types. The label  
315 assignment approach deliberately introduces variability in absolute color intensities of  
316 correct answers across different instances and viewing orientations. In isometric views  
317 where maximum stress concentrations may appear edge-on or obscured, the labeled  
318 point nearest to the numerical maximum location may not exhibit the deepest red  
319 coloring in the visualization. Similarly, certain viewing angles may render minimum  
320 value regions larger or smaller depending on three-dimensional geometry. This vari-  
321 ability ensures that successful localization depends on spatial reasoning about field  
322 distributions rather than simple color intensity comparisons among labeled regions.

### 323 1.7.6 Validation and Consistency Checks

324 After generating labeled visualizations and determining ground truth, the system per-  
325 forms consistency validation by verifying that numerical target locations extracted  
326 from simulation data correspond spatially to assigned ground truth regions. For max-  
327 imum value questions, the system computes the Euclidean distance between the  
328 coordinates exhibiting maximum field magnitude and the pixel coordinates of each  
329 labeled region, confirming that the minimum distance corresponds to the region des-  
330 ignated as ground truth. When validation fails—typically due to extreme viewing  
331 angles rendering target locations outside the visible domain or due to numerical preci-  
332 sion issues in coordinate transformations between three-dimensional simulation space  
333 and two-dimensional image space—the system flags the instance for manual review or  
334 regenerates the visualization with alternative camera parameters. Across the complete  
335 benchmark dataset, validation failure rates remain below 2%, occurring primarily in  
336 cases where maximum values concentrate at geometric features (corners, edges) that  
337 project to image boundaries in certain viewing orientations.



## 1.8 OCR and Image Processing Parameters

All image processing operations employ standardized parameters derived from extensive testing across diverse simulation visualizations. The **EasyOCR** reader initializes with English language models and processes images at their native 1920×1440 resolution without downsampling. Text detection employs a confidence threshold of 0.3, representing a balance between capturing legitimate text elements (which typically exhibit confidence scores above 0.5) and avoiding false positives from visual artifacts or simulation features that superficially resemble text. Color distance calculations throughout the system employ Euclidean metrics in RGB space:  $d = \sqrt{(R_1 - R_2)^2 + (G_1 - G_2)^2 + (B_1 - B_2)^2}$ . While perceptually uniform color spaces such as CIELAB might provide more accurate color similarity measures, RGB Euclidean distance suffices for the relatively saturated rainbow gradients employed in engineering visualizations and avoids computational overhead from color space transformations. Grayscale detection identifies pixels where maximum channel differences fall below 30 units on the 0-255 scale:  $\max(|R-G|, |G-B|, |B-R|) < 30$ . This criterion successfully distinguishes achromatic background elements, text, and annotations from chromatic simulation data across diverse visualization styles while accommodating subtle color casts that may arise from rendering antialiasing.

## 1.9 Computational Efficiency and Scalability

The automated extraction system processes complete question sets (10 questions spanning multiple visualization orientations and field variables) for a single simulation case in approximately 5-15 minutes on standard workstation hardware, depending on mesh density and complexity of required analyses. This represents a 100-fold improvement in throughput compared to manual expert annotation while eliminating subjective variability inherent in human interpretation of complex visualizations. Session reuse constitutes the primary efficiency optimization, avoiding repeated file loading and solver initialization overhead. Secondary optimizations include vectorized array operations through NumPy for statistical calculations and batched visualization generation for questions sharing common rendering parameters. The system’s architecture supports straightforward parallelization across multiple simulation cases, enabling scalable dataset generation limited only by available computational resources rather than human expert availability. All threshold values, tolerance parameters, and computational procedures remain consistent across the entire benchmark dataset, ensuring that ground truth quality depends on implementation fidelity rather than annotator expertise.

# 2 Supplementary Note 2: Complete Evaluation Specifications and Protocols

## 2.0.1 System Prompt

The following system prompt was used across all models without modification:

```

377 "You are a visual question answering assistant. You MUST follow
378 this exact format:\n\n"
379 "FORMAT REQUIREMENTS:\n"
380 "Line 1: Copy the EXACT answer text from the provided options (
381 word-for-word, including all symbols)\n"
382 "Line 2: One brief explanation sentence (10-15 words)\n\n"
383 "CRITICAL RULES:\n"
384 "1. The first line MUST be an EXACT COPY of one option - do not
385 paraphrase or summarize\n"
386 "2. Copy ALL words, punctuation, and mathematical symbols
387 exactly as shown in the option\n"
388 "3. Do NOT add phrases like 'The answer is' or explanatory text
389 on line 1\n"
390 "4. Do NOT shorten or reword long options - copy them
391 completely\n\n"
392 "EXAMPLE 1 (Simple):\n"
393 "Question: Is the sky blue?\n"
394 "Options: Yes, No\n"
395 "CORRECT:\n"
396 "Yes\n"
397 "The clear atmosphere scatters blue wavelengths effectively.\n\
398 n"
399 "EXAMPLE 2 (Complex option with symbols):\n"
400 "Question: What is the range?\n"
401 "Options: Less than 10x min, More than 1000x min\n"
402 "CORRECT:\n"
403 "More than 1000x min\n"
404 "The values span from 7 billion to 1.6 trillion.\n\n"
405 "INCORRECT:\n"
406 "More than three orders of magnitude\n"
407 "(This paraphrases instead of copying the exact option)\n\n"
408 "Remember: Line 1 = EXACT COPY of option. Line 2 = explanation
409 ."

```

## 410 2.0.2 User Prompt Template

411 For each question instance, the following template format was used:

```

412 prompt += "Instructions:\n"
413 prompt += "1. First line: Provide ONLY your answer exactly as
414 it appears in the options above (e.g., 'A', 'Yes', 'X axis',
415 etc.). Do NOT add any other text on this line.\n"
416 prompt += "2. Second line onwards: Provide a brief summary (1-2
417 sentences) explaining your reasoning.\n\n"
418 prompt += "Answer:"

```

419 For video inputs, no prompt modifications were applied beyond the standard tem-  
420 plate. Both image and video modalities received identical prompting to enable direct  
421 performance comparison.

### 2.0.3 Rationale

The two-line structured output format addresses two critical evaluation requirements: (1) enabling automated answer extraction through simple line-based parsing without requiring complex natural language interpretation of model responses, and (2) requiring models to provide reasoning justification for post-hoc error analysis. Pilot testing revealed that models frequently paraphrased answer options or embedded answers within explanatory text when using free-form prompts, creating ambiguity in correctness determination. The strict format requirements with explicit positive and negative examples eliminate this source of evaluation error while maintaining consistency across diverse model architectures and deployment methods.

## 2.1 Model Configurations

Supplementary tables 1, 2, and 3 present complete configuration parameters for all evaluated models. All parameters remained fixed across the entire evaluation to ensure reproducibility.

Temperature 0.0 configurations enforce deterministic sampling for reproducibility, while non-zero temperatures (Qwen models) follow official deployment guidelines specifying optimal operating points for visual reasoning tasks.

## 2.2 Video Processing Specifications

### 2.2.1 Source Video Characteristics

Original simulation videos were generated with domain-specific parameters:

1. **Structural Analysis:** 200 frames at 29 frames/second (7 seconds duration). Maximum deformation occurs at frame 100 (temporal midpoint), after which the simulation reverses to initial state.
2. **Fluid Dynamics:** 200 frames at 40 frames/second (5 seconds duration). Frames represent pathlines showing steady-state flow solution.

All videos rendered at 1920×1440 pixel resolution with H.264 compression, matching static image resolution to ensure consistent visual detail across media types.

### 2.2.2 Frame Extraction Strategy

Video frame extraction employed middle-frame-centered uniform sampling: for videos with  $N$  total frames requiring  $K$  extracted frames, the system first selected the middle frame at position  $\lfloor N/2 \rfloor$ , then sampled  $(K - 1)/2$  frames before and after this midpoint at uniform intervals. This strategy ensures that structural analysis videos always include the maximum deformation state (which occurs at the temporal midpoint) in the frame set provided to models.

Extracted frames maintained 1920×1440 resolution and saved as PNG with lossless compression before model input.

## 458 2.3 Reproducibility Protocols

### 459 2.3.1 Dataset Access

460 The benchmark dataset is available through HuggingFace for both structural anal-  
461 ysis (<https://huggingface.co/datasets/cmudrc/OpenSeeSimE-Structural>) and fluid  
462 dynamics (<https://huggingface.co/datasets/cmudrc/OpenSeeSimE-Fluid>).

### 463 2.3.2 Random Seed Configuration

464 All stochastic components (Python random module, NumPy random number gen-  
465 erator, PyTorch CUDA random number generator) initialized with seed value 42  
466 before evaluation. For models employing non-deterministic sampling (Qwen-235B at  
467 temperature 0.7), complete response logs can be requested for exact replication.

### 468 2.3.3 Software Environment

469 Critical dependency versions: Python 3.10, PyTorch 2.1.0 (CUDA 12.8), HuggingFace  
470 Transformers 4.36.0, HuggingFace Datasets 2.16.0, OpenCV 4.8.1, OpenAI Python  
471 SDK 1.6.1, Anthropic Python SDK 0.8.1, Google Generative AI 0.3.2. Hardware: 2  
472 X NVIDIA 5090 32GB GPUs with single-GPU inference for models  $\leq 8$ B parameters  
473 and dual-GPU tensor parallelism for larger models.

### 474 2.3.4 Code Availability

475 Complete evaluation code, configuration files, and documentation are available at  
476 <https://github.com/cmudrc/OpenSeeSimE-Full> under MIT License. The reposi-  
477 tory includes shared utilities for prompt construction and response parsing, checkpoint  
478 management infrastructure, and setup instructions.

## 479 3 Supplementary Note 3: Complete Question 480 Specifications and Failure Analysis

481 During experiments we observed that VLMs would produce a variety of noncompliant  
482 responses. We categorize these responses into three primary types: explicit refusals  
483 (models claim insufficient information despite adequate visual evidence), contradic-  
484 tory reasoning (models generate conflicting analyses without resolution), and purely  
485 descriptive responses (models describe observations without completing reasoning to  
486 answer).

### 487 3.0.1 Explicit Refusals

488 In fluid dynamics evaluation, models occasionally refuse to answer despite adequate  
489 visual information. The most extreme case occurs in InternVL-1B which displayed  
490 systematic refusals. The dominant refusal phrase “not directly comparable to the  
491 sound speed in water without additional context” appears in these failures, despite  
492 images containing sufficient information (velocity values) to perform straightforward  
493 Mach number calculations. Additional refusals citing “not specified in the image” occur

even when velocity magnitudes are explicitly displayed. This represents a calibration failure where the model refuses to make reasonable inferences from available visual data. In structural analysis, refusal rates remain negligible across all models, suggesting this failure mode is task-specific.

### 3.0.2 Contradictory/Conflicting Information

Models frequently generate internally inconsistent analyses, particularly in spatial reasoning tasks. In structural analysis, models exhibit contradictory reasoning in 44.7% of None responses, describing spatial features or stress distributions without mapping these observations to required answer choices. Representative examples include statements like “The color red in the color bar and the ‘Max’ label indicate the highest value, which corresponds to the maximum displacement” or “clear axis of symmetry along the X-axis, as indicated by the symmetrical pattern,” but failing to conclude which labeled point (A/B/C/D) corresponds to these observations. In fluid dynamics, contradictory reasoning manifests as factually incorrect assessments that contradict the correct answer. The most prominent pattern occurs in Llama-3.2-11B, where 38.3% of its fluid failures contain the phrase “greater than the speed of sound in water,” without specifying transonic or supersonic. These contradictions indicate reasoning failures where models generate contradictory answers rather than merely failing to format answers correctly.

### 3.0.3 Purely Descriptive Responses

Several models are solely in observation mode, providing detailed descriptions without reasoning to conclusions. This pattern appears predominantly in structural analysis, affecting 60% of None responses in smaller models. Representative responses include “The image shows a 3D stress distribution with a clear axis of symmetry” or “color-coded map representing total deformation, indicating a gradual change across the structure” without identifying requested locations or classifying deformation types. Models provide accurate visual observations but fail to complete the reasoning chain to categorical answers. This failure mode is notably less prevalent in fluid dynamics tasks, suggesting particular difficulty in bridging visual observations to spatial categorical answers in structural mechanics contexts.

### 3.0.4 Model-Specific Patterns

InternVL-1B demonstrates the most severe and systematic failures, with 5,042 None responses in fluid dynamics (55.9% of all fluid failures across models) driven primarily by explicit refusals. This substantially exceeds other models’ failure rates and represents a fundamental limitation in the model’s ability to perform basic inferential reasoning from visual data. In structural analysis, the same model shows 84.8% purely descriptive failures, indicating consistent difficulty in completing reasoning chains across both domains. Larger models (GPT-5, Claude-Sonnet-4-5) show minimal non-extraction failures, with most None responses attributable to API infrastructure

533 issues rather than cognitive limitations. Mid-size models (Gemma-12B, Llama-3.2-  
534 11B) demonstrate intermediate failure rates with more varied patterns including  
535 incomplete analyses and contradictory answers.

### 536 3.1 Complete Question Specifications

537 This section provides the comprehensive question sets employed in OpenSeeSimE. All  
538 questions were designed to assess engineering visualization interpretation across two  
539 primary analysis domains: structural mechanics and computational fluid dynamics.

#### 540 3.1.1 Structural Analysis Questions

541 The structural analysis question set comprises ten questions spanning symmetry  
542 detection, stress classification, deformation characterization, and spatial localization  
543 tasks.

544 1. Is the deformation pattern symmetric across any axis?

- 545 • Question Category: Relationship Understanding
- 546 • Question Type: Binary
- 547 • Options: Yes, No

548 2. Are the stresses predominantly tensile in nature?

- 549 • Question Category: Reasoning
- 550 • Question Type: Binary
- 551 • Options: Yes, No

552 3. Is the [stress/strain/temperature/pressure] distribution pattern uniform?

- 553 • Question Category: Captioning
- 554 • Question Type: Binary
- 555 • Options: Yes, No

556 4. The significant deformation in the model is primarily:

- 557 • Question Category: Relationship Understanding
- 558 • Question Type: Multiple Question
- 559 • Options:
  - 560 (a) Y axis
  - 561 (b) X axis
  - 562 (c) Z axis
  - 563 (d) Complex multi-directional

564 5. What is the axis of symmetry?

- 565 • Question Category: Relationship Understanding
- 566 • Question Type: Multiple Question
- 567 • Options:
  - 568 (a) X

- 569 (b) Y  
 570 (c) Z  
 571 (d) None/Multiple
- 572 6. The dominant stress type in the critical region is:
- 573 • Question Category: Reasoning  
 574 • Question Type: Multiple Question  
 575 • Options:
- 576 (a) Bending dominant  
 577 (b) Shear dominant  
 578 (c) Axial dominant  
 579 (d) Torsion dominant
- 580 7. Where is the maximum [displacement/stress/strain/temperature] located in the  
 581 model?
- 582 • Question Category: Grounding  
 583 • Question Type: Spatial  
 584 • Options: A, B, C, D
- 585 8. Where is the minimum [displacement/stress/strain/temperature] located in the  
 586 model?
- 587 • Question Category: Grounding  
 588 • Question Type: Spatial  
 589 • Options: A, B, C, D
- 590 9. What is the approximate range (maximum-minimum) of values in the displayed  
 591 contour plot?
- 592 • Question Category: Captioning  
 593 • Question Type: Multiple Question  
 594 • Options:
- 595 (a) Less than one order of magnitude ( $\max < 10 \times \min$ )  
 596 (b) One to two orders of magnitude ( $10 \times \min < \max < 100 \times \min$ )  
 597 (c) Two to three orders of magnitude ( $100 \times \min < \max < 1000 \times \min$ )  
 598 (d) More than three orders of magnitude ( $\max > 1000 \times \min$ )
- 599 10. There is primarily what type of deformation?
- 600 • Question Category: Captioning  
 601 • Question Type: Multiple Question  
 602 • Options:
- 603 (a) In-plane deformation  
 604 (b) Out-of-plane deformation  
 605 (c) Complex multi-directional deformation  
 606 (d) No significant deformation

### 607 3.1.2 Fluid Analysis Questions

608 The computational fluid dynamics question set comprises ten questions evaluating  
609 flow field interpretation, symmetry detection, flow regime classification, and spatial  
610 pattern recognition. These questions assess comprehension of velocity, pressure, and  
611 temperature distributions in fluid simulations.

612 1. Are there dead zones (stagnant flow areas) visible in the simulation?

- 613 • Question Category: Reasoning
- 614 • Question Type: Binary
- 615 • Options: Yes, No

616 2. Is the flow field symmetric across any axis?

- 617 • Question Category: Captioning
- 618 • Question Type: Binary
- 619 • Options: Yes, No

620 3. The flow is only in one direction

- 621 • Question Category: Captioning
- 622 • Question Type: Binary
- 623 • Options: Yes, No

624 4. Are there regions of low velocity and low pressure?

- 625 • Question Category: Relationship Understanding
- 626 • Question Type: Binary
- 627 • Options: Yes, No

628 5. What is the axis of symmetry?

- 629 • Question Category: Relationship Understanding
- 630 • Question Type: Multiple Question
- 631 • Options:
  - 632 (a) X
  - 633 (b) Y
  - 634 (c) Z
  - 635 (d) None/Multiple

636 6. How would you characterize the flow speed relative to sound speed?

- 637 • Question Category: Reasoning
- 638 • Question Type: Multiple Question
- 639 • Options:
  - 640 (a) Subsonic ( $\text{Mach} < 0.8$ )
  - 641 (b) Transonic ( $0.8 < \text{Mach} < 1.2$ )
  - 642 (c) Supersonic ( $\text{Mach} > 1.2$ )
  - 643 (d) N/A



- 644 7. Where is the maximum [velocity/pressure/temperature] located in the flow field?
- 645 • Question Category: Grounding
  - 646 • Question Type: Spatial
  - 647 • Options: A, B, C, D
- 648 8. Where is the minimum [velocity/pressure/temperature] located in the flow field?
- 649 • Question Category: Grounding
  - 650 • Question Type: Spatial
  - 651 • Options: A, B, C, D
- 652 9. What is the approximate range (maximum-minimum) of values in the displayed  
653 contour plot?
- 654 • Question Category: Captioning
  - 655 • Question Type: Multiple Question
  - 656 • Options:
- 657 (A) Less than one order of magnitude ( $\max < 10 \times \min$ )
  - 658 (B) One to two orders of magnitude ( $10 \times \min < \max < 100 \times \min$ )
  - 659 (C) Two to three orders of magnitude ( $100 \times \min < \max < 1000 \times \min$ )
  - 660 (D) More than three orders of magnitude ( $\max > 1000 \times \min$ )
- 661 10. Flow is dominantly along which axis (If axis is not visible, select between axial and  
662 radial as X and Y respectively)?
- 663 • Question Category: Relationship Understanding
  - 664 • Question Type: Multiple Question
  - 665 • Options:
- 666 (a) X
  - 667 (b) Y
  - 668 (c) Z
  - 669 (d) Complex Multidirectional
- 670 The complete OpenSeeSimE dataset including all simulation instances, question-  
671 answer pairs, visualizations, and metadata is publicly available for both struc-  
672 tural analysis (<https://huggingface.co/datasets/cmudrc/OpenSeeSimE-Structural>)  
673 and fluid analysis (<https://huggingface.co/datasets/cmudrc/OpenSeeSimE-Fluid>).
